# Supplementary material
Source: Springer Nature journal article supplement (https://www.springermedizin.de/resource/supplementary/12987_2007_288_MOESM4_ESM.pdf/9611726)

Pressure

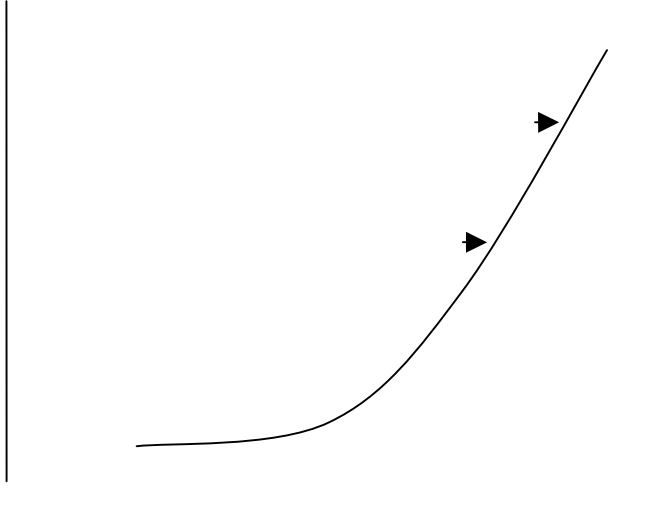

Volume

a

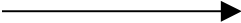

b

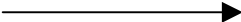

Supplement: MOESM4 [file 9611726]
